# Supplementary material
Source: PubMed Central journal article supplement (PMC4309712)
Supplement: AEM.03470-14_zam999116041so1.pdf [file AEM.03470-14_zam999116041so1.pdf]

**Table S1:** Summary of bacterial (16S rRNA) sequence library sizes, filtered sequences, operational taxonomic units (OTUs), diversity, richness and coverage estimates. OTUs were defined as sequences sharing >97% similarity and served as the basis for the Shannon, Simpson, Chao I and Coverage calculations. <sup>1</sup> = the number corresponds to which planting (1-3) the samples are from. wap =weeks after planting.

| Farm             | Sample name                             | Time of sampling     | Seq library size | Filtered sequences | OTUs identified | Simpson | Shannon | Chao I richness | Coverage |      |
|------------------|-----------------------------------------|----------------------|------------------|--------------------|-----------------|---------|---------|-----------------|----------|------|
| Farm Leafy green | 6                                       | 3 wap 1 <sup>1</sup> | 91727            | 21172              | 1290            | 12.05   | 3.97    | 2645.28         | 0.97     |      |
|                  | 7                                       | 3 wap 1              | 110250           | 15673              | 717             | 2.67    | 2.24    | 1496.22         | 0.97     |      |
|                  | 8                                       | 3 wap 1              | 157490           | 18586              | 1249            | 6.66    | 3.59    | 2528.10         | 0.96     |      |
|                  | 9                                       | harvest 1            | 196746           | 11673              | 263             | 11.74   | 3.02    | 683.75          | 0.99     |      |
|                  | 10                                      | harvest 1            | 277806           | 58353              | 362             | 11.09   | 2.70    | 862.11          | 1.00     |      |
|                  | 11                                      | harvest 1            | 217801           | 43980              | 269             | 3.18    | 1.59    | 764.34          | 1.00     |      |
|                  | 12                                      | harvest 1            | 1130173          | 165898             | 653             | 2.75    | 1.58    | 1607.76         | 1.00     |      |
|                  | 17                                      | 3 wap 2              | 692820           | 44150              | 1384            | 9.96    | 3.44    | 2741.02         | 0.98     |      |
|                  | 18                                      | 3 wap 2              | 510421           | 72234              | 1718            | 9.22    | 3.25    | 3098.13         | 0.99     |      |
|                  | 19                                      | 3 wap 2              | 436110           | 30188              | 572             | 6.20    | 2.48    | 1198.54         | 0.99     |      |
|                  | 20                                      | 3 wap 2              | 294271           | 56678              | 2011            | 21.73   | 4.25    | 3610.73         | 0.98     |      |
|                  | Farm Vestfold,<br><i>Lactuca sativa</i> | 21                   | harvest 2        | 807594             | 102974          | 1460    | 6.01    | 2.90            | 2712.85  | 0.99 |
|                  |                                         | 22                   | harvest 2        | 457194             | 25190           | 701     | 9.57    | 3.09            | 1419.18  | 0.98 |
|                  |                                         | 23                   | harvest 2        | 501525             | 30295           | 740     | 8.90    | 3.01            | 1550.27  | 0.99 |
|                  |                                         | 24                   | harvest 2        | 898390             | 108861          | 3531    | 18.36   | 4.46            | 6267.76  | 0.98 |
|                  |                                         | 29                   | 3 wap 3          | 674589             | 35191           | 1635    | 18.15   | 4.16            | 3054.85  | 0.98 |
|                  |                                         | 30                   | 3 wap 3          | 455331             | 59711           | 949     | 7.42    | 2.81            | 1747.41  | 0.99 |
|                  |                                         | 31                   | 3 wap 3          | 1035950            | 52441           | 2568    | 37.59   | 4.89            | 4514.55  | 0.98 |
|                  |                                         | 32                   | 3 wap 3          | 418170             | 13076           | 1169    | 33.46   | 4.82            | 2096.84  | 0.96 |
|                  |                                         | 33                   | harvest 3        | 781248             | 80143           | 363     | 2.66    | 1.67            | 781.75   | 1.00 |
| 34               |                                         | harvest 3            | 760765           | 121620             | 822             | 11.49   | 3.10    | 1616.59         | 1.00     |      |
| 35               |                                         | harvest 3            | 1185772          | 88886              | 524             | 7.57    | 2.70    | 949.04          | 1.00     |      |
| 36               |                                         | harvest 3            | 441797           | 51756              | 337             | 7.34    | 2.56    | 687.07          | 1.00     |      |
| 41               |                                         | 3 wap 1              | 479982           | 143644             | 3161            | 11.92   | 3.93    | 5273.26         | 0.99     |      |

|                                                |    |           |        |        |      |       |      |         |      |
|------------------------------------------------|----|-----------|--------|--------|------|-------|------|---------|------|
|                                                | 42 | 3 wap 1   | 698430 | 171939 | 1641 | 4.76  | 2.56 | 3071.56 | 1.00 |
|                                                | 43 | 3 wap 1   | 570076 | 380083 | 2696 | 8.00  | 2.79 | 4447.42 | 1.00 |
|                                                | 45 | harvest 1 | 398169 | 33698  | 166  | 4.31  | 2.07 | 312.71  | 1.00 |
|                                                | 46 | harvest 1 | 695062 | 25076  | 247  | 4.81  | 2.12 | 546.09  | 0.99 |
|                                                | 47 | harvest 1 | 601617 | 10260  | 272  | 7.69  | 2.70 | 664.70  | 0.98 |
|                                                | 48 | harvest 1 | 265463 | 32386  | 170  | 3.99  | 1.75 | 383.90  | 1.00 |
|                                                | 53 | 3 wap 2   | 526668 | 9549   | 650  | 13.13 | 3.66 | 1304.64 | 0.96 |
|                                                | 54 | 3 wap 2   | 778255 | 335039 | 795  | 1.03  | 0.14 | 1977.51 | 1.00 |
|                                                | 55 | 3 wap 2   | 154569 | 2998   | 465  | 13.34 | 4.10 | 952.80  | 0.91 |
|                                                | 56 | 3 wap 2   | 153097 | 1720   | 418  | 26.77 | 4.54 | 866.93  | 0.85 |
| Farm Buskerud,<br><i>Lactuca sativa</i>        | 57 | harvest 2 | 309820 | 26389  | 727  | 13.13 | 3.41 | 1315.49 | 0.99 |
|                                                | 58 | harvest 2 | 405115 | 59683  | 610  | 5.05  | 2.32 | 1229.68 | 0.99 |
|                                                | 59 | harvest 2 | 321777 | 82509  | 637  | 5.23  | 2.46 | 1259.13 | 1.00 |
|                                                | 60 | harvest 2 | 507530 | 14305  | 397  | 7.78  | 2.85 | 815.69  | 0.98 |
|                                                | 65 | 3 wap 3   | 230143 | 12987  | 160  | 3.63  | 1.82 | 418.67  | 0.99 |
|                                                | 66 | 3 wap 3   | 448708 | 19353  | 225  | 5.34  | 2.23 | 427.97  | 0.99 |
|                                                | 67 | 3 wap 3   | 933063 | 29076  | 631  | 4.97  | 2.39 | 1477.46 | 0.99 |
|                                                | 69 | harvest 3 | 392534 | 33861  | 238  | 7.82  | 2.62 | 442.00  | 1.00 |
|                                                | 70 | harvest 3 | 300931 | 85677  | 211  | 2.54  | 1.62 | 493.55  | 1.00 |
|                                                | 71 | harvest 3 | 295638 | 11271  | 199  | 7.10  | 2.71 | 401.22  | 0.99 |
|                                                | 72 | harvest 3 | 621195 | 27858  | 177  | 4.07  | 2.16 | 400.25  | 1.00 |
|                                                | 73 | harvest 1 | 674194 | 442820 | 500  | 4.37  | 2.18 | 1155.12 | 1.00 |
|                                                | 74 | harvest 1 | 210420 | 141315 | 319  | 8.86  | 2.70 | 578.22  | 1.00 |
|                                                | 75 | harvest 1 | 705941 | 474117 | 809  | 8.95  | 2.73 | 1966.88 | 1.00 |
| Farm Buskerud,<br><i>Diplotaxis tenuifolia</i> | 76 | harvest 2 | 109001 | 62636  | 332  | 11.31 | 3.04 | 696.79  | 1.00 |
|                                                | 77 | harvest 2 | 294116 | 202935 | 526  | 16.12 | 3.26 | 1020.02 | 1.00 |
|                                                | 78 | harvest 2 | 281344 | 181957 | 521  | 19.62 | 3.46 | 975.28  | 1.00 |

**Table S2.** Differentially abundant phyla and genera in selected groups using Metastats analysis ( $P < 0.05$ ) (1). Only taxa with most differences between groups are shown (abundance  $\geq 0.002 \pm \text{SE}$ ). The groups with most abundant phylum and genus are underlined. wap = weeks after planting.

| <i>Lactuca sativa</i> , Buskerud and Vestfold |                        |                       |         |
|-----------------------------------------------|------------------------|-----------------------|---------|
| Phyla                                         | 3wap, total            | harvest, total        | P-value |
| Acidobacteria                                 | <u>0.008 ± 0.002</u>   | 0.001 ± 0.0004        | 0.002   |
| Actinobacteria                                | <u>0.046 ± 0.01</u>    | 0.007 ± 0.002         | 0.002   |
| Planctomycetacia                              | <u>0.002 ± 0.0005</u>  | 0.0002 ± 0.00009      | 0.002   |
| Proteobacteria                                | 0.09 ± 0.02            | <u>0.22 ± 0.04</u>    | 0.002   |
| Verrucomicrobia                               | <u>0.002 ± 0.0005</u>  | 0.0001 ± 0.00007      | 0.002   |
| Genera                                        | 3wap, total            | harvest, total        |         |
| Duganella                                     | 0.07 ± 0.015           | <u>0.19 ± 0.03</u>    | 0.001   |
| Pedobacter                                    | 0.002 ± 0.0004         | <u>0.007 ± 0.0017</u> | 0.001   |
| Rhizobium                                     | 0.003 ± 0.001          | <u>0.028 ± 0.007</u>  | 0.001   |
| <i>Lactuca sativa</i> , Buskerud              |                        |                       |         |
| Phyla                                         | harvest planting 1, 3  | harvest planting 2    | P-value |
| Acidobacteria                                 | 0.00005 ± 0.00003      | <u>0.001 ± 0.0004</u> | 0.02    |
| Actinobacteria                                | <u>0.03 ± 0.009</u>    | 0.003 ± 0.001         | 0.02    |
| Bacteroidetes                                 | <u>0.03 ± 0.01</u>     | 0.003 ± 0.001         | 0.02    |
| Firmicutes                                    | 0.0006 ± 0.0003        | <u>0.003 ± 0.001</u>  | 0.03    |
| Proteobacteria                                | <u>0.35 ± 0.1</u>      | 0.31 ± 0.07           | 0.03    |
| Genera                                        | harvest planting 1, 3  | harvest planting 2    |         |
| Arthrobacter                                  | 0.002 ± 0.0007         | <u>0.006 ± 0.002</u>  | 0.02    |
| Hymenobacter                                  | 0.0002 ± 0.0001        | <u>0.033 ± 0.009</u>  | 0.001   |
| Nocardioides                                  | 0.0002 ± 0.00008       | <u>0.004 ± 0.002</u>  | 0.01    |
| Paracoccus                                    | 0.00009 ± 0.00006      | <u>0.003 ± 0.002</u>  | 0.04    |
| Pseudomonas                                   | <u>0.36 ± 0.09</u>     | 0.28 ± 0.05           | 0.009   |
| Rhizobium                                     | <u>0.02 ± 0.007</u>    | 0.008 ± 0.002         | 0.04    |
| Sphingomonas                                  | 0.08 ± 0.03            | <u>0.3 ± 0.07</u>     | 0.004   |
| <i>Lactuca sativa</i> , Vestfold              |                        |                       |         |
| Phyla                                         | harvest, planting 1, 3 | harvest, planting 2   | P-value |
| Acidobacteria                                 | 0.0003 ± 0.0002        | <u>0.004 ± 0.001</u>  | 0.03    |
| Actinobacteria                                | 0.008 ± 0.005          | <u>0.09 ± 0.02</u>    | 0.02    |
| Bacteroidetes                                 | <u>0.02 ± 0.01</u>     | 0.003 ± 0.001         | 0.03    |
| Firmicutes                                    | 0.0009 ± 0.0004        | <u>0.013 ± 0.005</u>  | 0.02    |
| Proteobacteria                                | <u>0.37 ± 0.1</u>      | 0.15 ± 0.04           | 0.03    |

| <b>Genera</b>    | <b>harvest, planting 1, 3</b> | <b>harvest, planting 2</b> |        |
|------------------|-------------------------------|----------------------------|--------|
| Arthrobacter     | 0.007 ± 0.004                 | <u>0.08 ± 0.01</u>         | 0.0003 |
| Brevundimonas    | 0.006 ± 0.003                 | <u>0.03 ± 0.009</u>        | 0.009  |
| Chryseobacterium | <u>0.02 ± 0.009</u>           | 0.00003 ± 0.00003          | 0.03   |
| Massilia         | 0.03 ± 0.006                  | <u>0.06 ± 0.01</u>         | 0.02   |
| Nocardioides     | 0.0003 ± 0.0001               | <u>0.002 ± 0.0004</u>      | 0.002  |
| Pantoea          | <u>0.22 ± 0.06</u>            | 0.004 ± 0.002              | 0.002  |
| Paracoccus       | 0.001 ± 0.0001                | <u>0.003 ± 0.0007</u>      | 0.002  |
| Rhizobium        | <u>0.05 ± 0.02</u>            | 0.01 ± 0.005               | 0.03   |
| Sphingomonas     | <u>0.05 ± 0.02</u>            | 0.03 ± 0.008               | 0.02   |

References:

1. **White JR, Nagarajan N, Pop M.** 2009. Statistical methods for detecting differentially abundant features in clinical metagenomic samples. *PLoS Comput Biol* **5**:10.
